# Supplementary material for: Microbiome Associated with the Mycangia of Female and Male Adults of the Ambrosia Beetle Platypus cylindrus Fab. (Coleoptera: Curculionidae)
Source: MDPI journal article supplement (doi:10.3390/insects12100881), 2021-09-29
Supplement: s1 [file s1]

**Table S1** DAtest results of the statistical test comparisons: (a) sequences collapsed at genus level, (b) ASVs

(a)

| Method                     | AUC  | FPR  | FDR  | Power | Score | Score.5% | Score.95% |   |
|----------------------------|------|------|------|-------|-------|----------|-----------|---|
| Log t-test (ltd)           | 0.90 | 0.04 | 0.00 | 0.23  | 0.09  | 0.00     | 0.27      | * |
| Welch's t-test - CLR (ttc) | 0.93 | 0.05 | 0.00 | 0.20  | 0.09  | -0.08    | 0.22      | * |
| Permutation (per)          | 0.75 | 0.04 | 0.00 | 0.20  | 0.05  | -0.24    | 0.10      | * |
| Wilcox (wil)               | 0.92 | 0.03 | 0.00 | 0.07  | 0.03  | 0.00     | 0.20      | * |
| t-test - ALR (tta)         | 0.89 | 0.03 | 0.00 | 0.07  | 0.03  | -1.02    | 0.25      | * |
| Log t-test2 (ltd2)         | 0.86 | 0.03 | 0.00 | 0.00  | 0.00  | 0.00     | 0.17      | * |
| t-test (ltd)               | 0.77 | 0.01 | 0.00 | 0.00  | 0.00  | 0.00     | 0.00      | * |
| Quasi-Poisson GLM (qpo)    | 0.60 | 0.13 | 0.38 | 0.07  | -0.37 | -1.00    | 0.04      |   |
| Poisson GLM (poi)          | 0.73 | 0.81 | 0.93 | 0.93  | -0.71 | -0.85    | -0.58     |   |
| Negbinom GLM (neb)         | 0.70 | 0.36 | 0.88 | 0.67  | -0.75 | -0.84    | -0.49     |   |

(b)

| Method                     | AUC  | FPR  | FDR  | Power | Score | Score.5% | Score.95% |   |
|----------------------------|------|------|------|-------|-------|----------|-----------|---|
| Welch's t-test - CLR (ttc) | 0.93 | 0.03 | 0.00 | 0.19  | 0.08  | 0.00     | 0.31      | * |
| Log t-test (ltd)           | 0.92 | 0.03 | 0.00 | 0.08  | 0.04  | 0.00     | 0.21      | * |
| Permutation (per)          | 0.67 | 0.04 | 0.00 | 0.17  | 0.03  | -0.06    | 0.07      | * |
| Wilcox (wil)               | 0.94 | 0.02 | 0.00 | 0.00  | 0.00  | 0.00     | 0.13      | * |
| Log t-test2 (ltd2)         | 0.85 | 0.03 | 0.00 | 0.00  | 0.00  | 0.00     | 0.05      | * |
| t-test (ltd)               | 0.75 | 0.01 | 0.00 | 0.00  | 0.00  | 0.00     | 0.00      | * |
| t-test - ALR (tta)         | 0.94 | 0.01 | 0.00 | 0.00  | 0.00  | -1.00    | 0.26      | * |
| Quasi-Poisson GLM (qpo)    | 0.61 | 0.14 | 0.25 | 0.00  | -0.25 | -1.00    | 0.00      |   |
| Poisson GLM (poi)          | 0.72 | 0.80 | 0.93 | 0.92  | -0.73 | -0.87    | -0.70     |   |
| Negbinom GLM (neb)         | 0.67 | 0.36 | 0.90 | 0.61  | -0.79 | -0.94    | -0.69     |   |

"Area Under the (Receiver Operator) Curve" (AUC), "False Positive Rate" (FPR), "False Discovery Rate" (FDR) and "Empirical power" (Power). Asterisks (\*) in the summary output means that a method is equally good as the best method.

**Table S2** Bacteria 16S rRNA gene sequences and samples after quality filtering and rarefaction of input data

| No. of samples | Sample-id | Sample-ref | Denoised | Merged | Non-chimeric | Bacterial sequences | Rarefied |
|----------------|-----------|------------|----------|--------|--------------|---------------------|----------|
| 1              | sample-22 | M.4.3.M    | 123956   | 109180 | 108690       | 2678                | 1260     |
| 2              | sample-7  | M2.1.F     | 53847    | 51806  | 51044        | 31579               | 1260     |
| 3              | sample-9  | M2.2.F     | 47336    | 45272  | 43723        | 38282               | 1260     |
| 4              | sample-20 | M4.1.M     | 34305    | 32898  | 32238        | 29297               | 1260     |
| 5              | sample-21 | M.4.3.F    | 31524    | 30500  | 30386        | 13750               | 1260     |
| 6              | sample-10 | M2.2.M     | 28401    | 26910  | 25712        | 22744               | 1260     |
| 7              | sample-12 | M2.3.M     | 21907    | 20588  | 20303        | 14028               | 1260     |
| 8              | sample-11 | M2.3.F     | 15520    | 14955  | 14773        | 8475                | 1260     |
| 9              | sample-19 | M4.1.F     | 13862    | 13633  | 13496        | 9951                | 1260     |
| 10             | sample-28 | M5.2.M     | 12867    | 12442  | 12310        | 11284               | 1260     |
| 11             | sample-4  | M1.2.M     | 13119    | 12253  | 12073        | 6726                | 1260     |
| 12             | sample-8  | M2.1.M     | 11760    | 10855  | 10440        | 8272                | 1260     |
| 13             | sample-1  | M1.1.F     | 10522    | 10014  | 9893         | 8767                | 1260     |
| 14             | sample-3  | M1.2.F     | 7317     | 6879   | 6777         | 5329                | 1260     |
| 15             | sample-2  | M1.1.M     | 4982     | 4786   | 4749         | 4639                | 1260     |
| 16             | sample-17 | M3.3.F     | 2809     | 2764   | 2734         | 2453                | 1260     |
| 17             | sample-24 | M.4.4.M    | 2684     | 2479   | 2458         | 2255                | 1260     |
| 18             | sample-23 | M.4.4.F    | 2681     | 2394   | 2356         | 2138                | 1260     |
| 19             | sample-26 | M5.1.M     | 2405     | 2264   | 2232         | 1963                | 1260     |
| 20             | sample-27 | M5.2.F     | 2279     | 2224   | 2214         | 2116                | 1260     |
| 21             | sample-18 | M3.3.M     | 2008     | 1957   | 1953         | 1260                | 1260     |
| 22             | sample-25 | M5.1.F     | 1584     | 1524   | 1511         | 1361                | 1260     |
| 23             | sample-6  | M1.3.M     | 1585     | 1522   | 1502         | 1490                | 1260     |
| 24             | sample-29 | M5.4.F     | 2613     | 1488   | 1479         | 1354                | 1260     |
| 25             | sample-15 | M3.2.F     | 1498     | 1426   | 1417         | 1332                | 1260     |
| 26             | sample-5  | M1.3.F     | 1318     | 1284   | 1275         | 1262                | 1260     |
| 27             | sample-14 | M3.1.M     | 1292     | 1265   | 1265         | 984                 |          |
| 28             | sample-13 | M3.1.F     | 1256     | 1181   | 1164         | 1105                |          |
| 29             | sample-16 | M.3.2.M    | 827      | 805    | 777          |                     |          |
| 30             | sample-30 | M.5.4.M    | 600      | 547    | 544          |                     |          |

**Table S3** Alpha diversity indices for mycangia of female and male adult beetles

| Alpha-diversity index | Gender |       | Kruskal-Wallis test |          |
|-----------------------|--------|-------|---------------------|----------|
|                       | female | male  | H                   | <i>p</i> |
| <b>Observed_ASVs</b>  | 73.43  | 91.75 | 1.11                | 0.291    |
| <b>Shannon</b>        | 4.71   | 5.09  | 2.22                | 0.136    |
| <b>Pielou_e</b>       | 0.81   | 0.82  | 1.42E-14            | 1        |
| <b>Faith_pd</b>       | 9.15   | 14.95 | 1.17                | 0.28     |

The sequences were rarefied to 1260 sequences. Mean values for n= 14 (female) and n=12 (male)

**Table S4** Alpha diversity indices for mycangia of beetles from different cork oaks

| Alpha-diversity index | Cork oak |        |        |        |        | Kruskal-Wallis test |          |
|-----------------------|----------|--------|--------|--------|--------|---------------------|----------|
|                       | Tree_1   | Tree_2 | Tree_3 | Tree_4 | Tree_5 | H                   | <i>p</i> |
| <b>Observed_ASVs</b>  | 64.83    | 142.5  | 28.67  | 87.33  | 55     | 13.84               | 0.008    |
| <b>Shannon</b>        | 4.59     | 5.56   | 4.15   | 5.08   | 4.64   | 7.54                | 0.11     |
| <b>Pielou_e</b>       | 0.8      | 0.78   | 0.87   | 0.82   | 0.84   | 7.06                | 0.133    |
| <b>Faith_pd</b>       | 6.39     | 22.55  | 3.71   | 13.92  | 7.83   | 14.89               | 0.005    |

The sequences were rarefied to 1260 sequences. Mean values for n= 6 (Tree\_1), n=6 (Tree\_2), n=3 (Tree\_3), n=6 (Tree\_4) and n=5 (Tree\_5)

**Table S5** Statistical results of the differential abundant analysis of the bacterial genera in female and male mycangia of *P. cylindrus* for Welch's t-test ( $p < 0.05$ )

| Taxonomy                                                                                                                | <i>p</i> | log2FC | ordering    | Genus                    | Method                     |
|-------------------------------------------------------------------------------------------------------------------------|----------|--------|-------------|--------------------------|----------------------------|
| d__Bacteria; p__Fusobacteriota; c__Fusobacteriia;<br>o__Fusobacteriales; f__Leptotrichiaceae; g__Leptotrichia           | 0.003    | 2.22   | male>female | <i>Leptotrichia</i>      | Welch's t-test - CLR (ttc) |
| d__Bacteria; p__Bacteroidota; c__Bacteroidia;<br>o__Chitinophagales; f__Chitinophagaceae; __                            | 0.006    | -1.86  | female>male | Chitinophagaceae         | Welch's t-test - CLR (ttc) |
| d__Bacteria; p__Actinobacteriota; c__Actinobacteria;<br>o__Micrococcales; f__Micrococcaceae; g__Rothia                  | 0.015    | 1.84   | male>female | <i>Rothia</i>            | Welch's t-test - CLR (ttc) |
| d__Bacteria; p__Proteobacteria; c__Gammaproteobacteria;<br>o__Enterobacterales; f__Erwiniaceae; __                      | 0.037    | -1.42  | female>male | Erwiniaceae              | Welch's t-test - CLR (ttc) |
| d__Bacteria; p__Firmicutes; c__Bacilli;<br>o__Lactobacillales; __; __                                                   | 0.039    | 1.39   | male>female | Lactobacillales          | Welch's t-test - CLR (ttc) |
| d__Bacteria; p__Actinobacteriota; c__Actinobacteria;<br>o__Micrococcales; f__Microbacteriaceae;<br>g__Pseudoclavibacter | 0.040    | -1.49  | female>male | <i>Pseudoclavibacter</i> | Welch's t-test - CLR (ttc) |
| d__Bacteria; p__Proteobacteria; c__Gammaproteobacteria;<br>o__Burkholderiales; f__Neisseriaceae; g__Neisseria           | 0.046    | 1.45   | male>female | <i>Neisseria</i>         | Welch's t-test - CLR (ttc) |

**Table S6** Statistical results of the differential abundant analysis of the bacterial sequences (ASVs) in female and male mycangia of *P. cylindrus* for Welch's t-test ( $p < 0.05$ )

| ASVs                             | <i>p</i> | log2FC | ordering    | Genus                    | Method                     |
|----------------------------------|----------|--------|-------------|--------------------------|----------------------------|
| 1b1c565a3cafb2fed30c8bcea39a77c9 | 0.001    | -2.05  | female>male | Microbacteriaceae        | Welch's t-test - CLR (ttc) |
| 2bd9309f2f97cae51d18d06ea1ca519a | 0.009    | 1.90   | male>female | Lactobacillales          | Welch's t-test - CLR (ttc) |
| d83f60183d81253a505beaeef3cd168f | 0.013    | 1.91   | male>female | <i>Rothia</i>            | Welch's t-test - CLR (ttc) |
| 929c82d69b2f15cffe7adf61b8c81fc8 | 0.015    | -1.30  | female>male | <i>Pseudoclavibacter</i> | Welch's t-test - CLR (ttc) |
| 4d72007c70f4abc0bf9e8fe8b826d07d | 0.025    | -1.21  | female>male | Enterobacteriaceae       | Welch's t-test - CLR (ttc) |
| b6825773b8b549f2ab996dcd37e1bedd | 0.026    | 1.34   | male>female | <i>Leptotrichia</i>      | Welch's t-test - CLR (ttc) |
| dd36571922ab7a138ee06438ab9c7891 | 0.031    | 1.71   | male>female | <i>Neisseria</i>         | Welch's t-test - CLR (ttc) |
| 947540e2f4a0221b97ceb93c35936ad4 | 0.033    | 1.01   | male>female | Sphingomonadaceae        | Welch's t-test - CLR (ttc) |
| c22b16cc6108c04f29fea3b6d4c81571 | 0.047    | -1.05  | female>male | <i>Acinetobacter</i>     | Welch's t-test - CLR (ttc) |
