# Supplementary material for: Microbiome Associated with the Mycangia of Female and Male Adults of the Ambrosia Beetle Platypus cylindrus Fab. (Coleoptera: Curculionidae)
Source: MDPI journal article supplement (doi:10.3390/insects12100881), 2021-09-29
Supplement: s1 [file s1]

**Figure S1** Alpha rarefaction curves of the 26 mycangia samples based on high-throughput sequencing (Illumina MiSeq) of bacterial communities: (a) Shannon, (b) observed ASVs, (c) number of samples by sex and (d) number of samples by cork oak tree. Color-coded lines represent all the samples from mycangia.

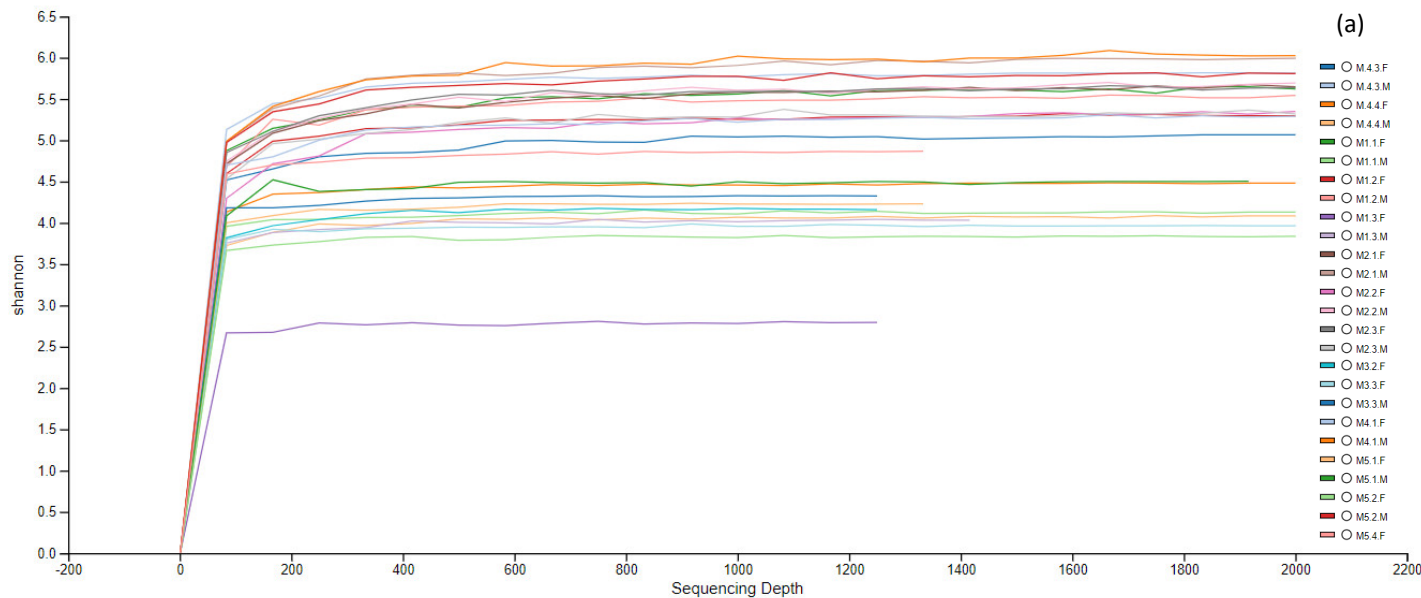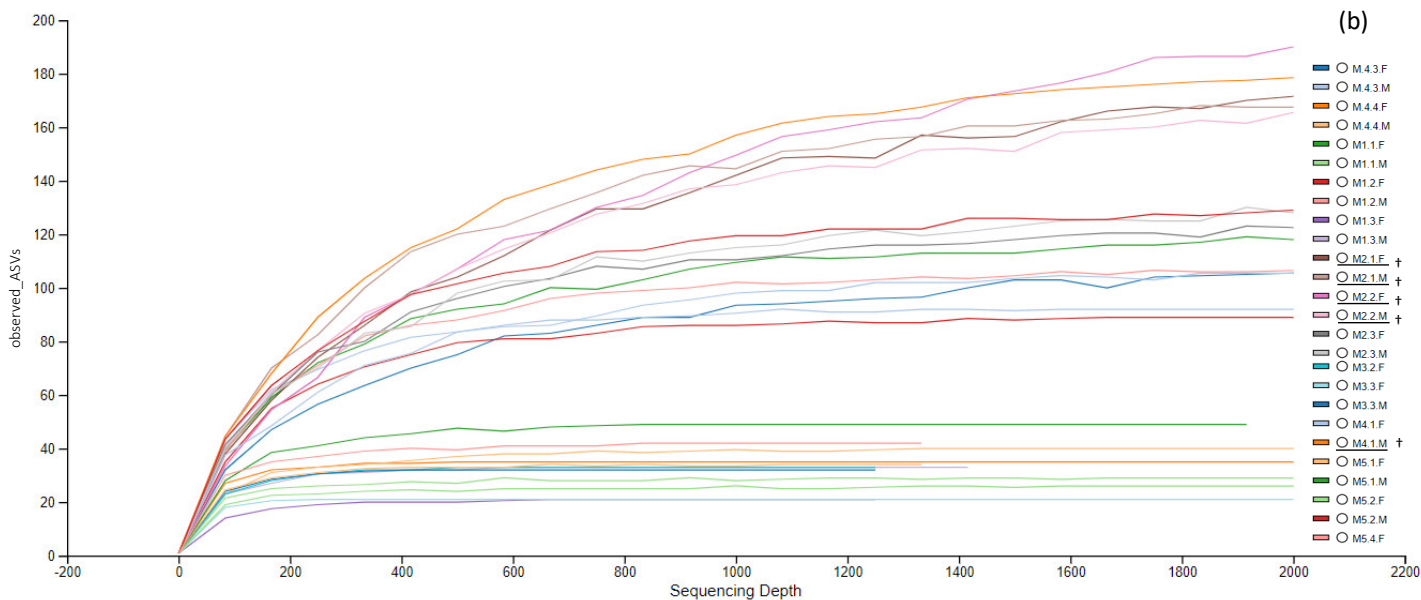

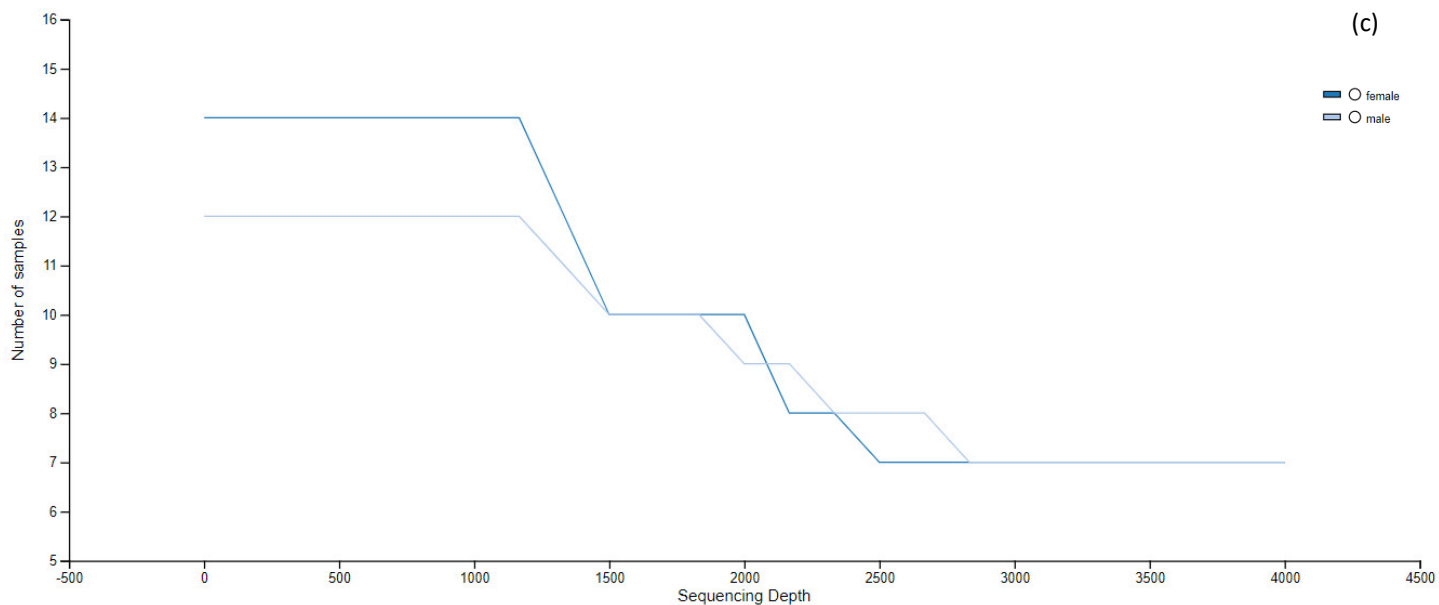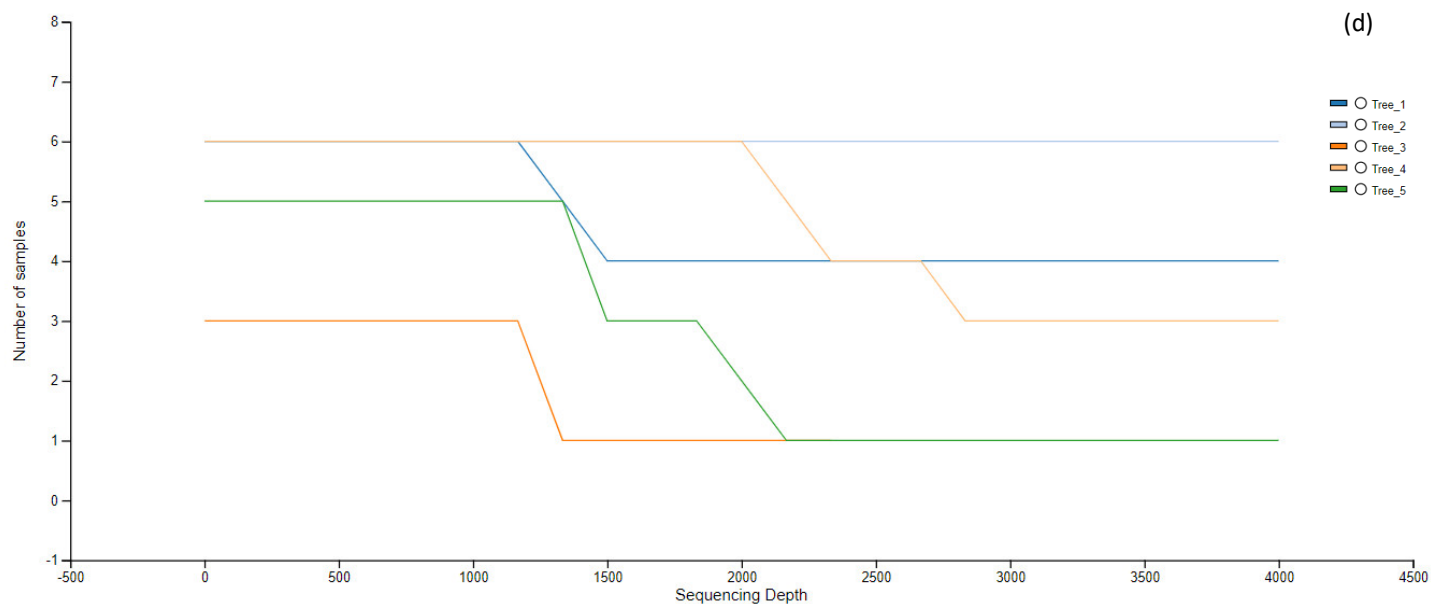

† Underscores in plot (b) highlight samples with observed ASVs  $\geq 160$  at 2000 sequencing depth

The 26 samples are distributed across female and male mycangia of five trees: six in Tree\_1 (Three females and three males; M1.1F, M1.1M, M1.2F, M1.2M, M1.3F, M1.3M), six in Tree\_2 (Three females and three males; M2.2M, M2.3F, M2.3M, M2.1F, M2.1M, M2.2F), three in Tree\_3 (Two females and one male; M3.2F, M3.3F, M3.3M), six in Tree\_4 (Three females and three males; M4.1F, M4.1M, M4.3F, M4.3M, M4.4F, M4.4M) and five in Tree\_5 (Three females and two males; M5.1F, M5.1M, M5.2F, M5.2M, M5.4F)
